# Supplementary material
Source: Springer Nature journal article supplement (https://www.springermedizin.de/resource/supplementary/12881_2014_1228_MOESM3_ESM.pdf/9452204)
Supplement: MOESM3 [file 9452204]

Table S2. The associations between asthma and ten *CHI3L1* tag SNPs

|            |    | Asthma<br>(N=628) | Control<br>(N=628) | <i>P</i> value | Allele Frequency and Hardy-Weinberg equilibrium <i>P</i> value <sup>a</sup> |                   |                   |
|------------|----|-------------------|--------------------|----------------|-----------------------------------------------------------------------------|-------------------|-------------------|
|            |    |                   |                    |                | Type                                                                        | Asthma            | control           |
| rs903358   | GG | 24 (3.8%)         | 24 (3.8%)          | 0.568          | G                                                                           | 18.96%            | 20.33%            |
|            | TG | 189 (30.2%)       | 207 (30.3%)        |                | T                                                                           | 81.04%            | 79.67%            |
|            | TT | 412 (65.9%)       | 396 (63.2%)        |                |                                                                             | <i>P</i> = 0.6899 | <i>P</i> = 0.6347 |
| rs7542294  | TT | 115 (18.3%)       | 104 (16.6%)        | 0.577          | T                                                                           | 42.6%             | 42.2%             |
|            | TC | 305 (48.6%)       | 322 (51.3%)        |                | C                                                                           | 57.4%             | 57.8%             |
|            | CC | 208 (33.1%)       | 202 (32.2%)        |                |                                                                             | <i>P</i> = 0.8631 | <i>P</i> = 0.2006 |
| rs946259   | AA | 81 (12.9%)        | 65 (10.4%)         | 0.368          | A                                                                           | 34.95%            | 32.88%            |
|            | GA | 277 (44.1%)       | 283 (45.1%)        |                | G                                                                           | 65.05%            | 67.12%            |
|            | GG | 270 (43.0%)       | 280 (44.6%)        |                |                                                                             | <i>P</i> = 0.4525 | <i>P</i> = 0.5998 |
| rs880633   | GG | 90 (14.4%)        | 72 (11.5%)         | 0.309          | G                                                                           | 37.56%            | 35.27%            |
|            | GA | 291(46.4%)        | 299 (47.6%)        |                | A                                                                           | 62.44%            | 64.73%            |
|            | AA | 246 (39.2%)       | 257(40.9%)         |                |                                                                             | <i>P</i> = 0.7923 | <i>P</i> = 0.2844 |
| rs12128727 | AA | 79 (12.6%)        | 65 (10.4%)         | 0.444          | A                                                                           | 34.72%            | 32.88%            |
|            | GA | 276 (44.2%)       | 283(45.1%)         |                | G                                                                           | 65.28%            | 67.12%            |
|            | GG | 270 (43.2%)       | 280 (44.6%)        |                |                                                                             | <i>P</i> = 0.5186 | <i>P</i> = 0.5998 |
| rs1538372  | CC | 270(43.0%)        | 226 (36.0%)        | 0.014          | C                                                                           | 66.32%            | 60.83%            |
|            | TC | 293(46.7%)        | 312 (49.7%)        |                | T                                                                           | 33.68%            | 39.17%            |
|            | TT | 65 (10.4%)        | 90 (14.3%)         |                |                                                                             | <i>P</i> = 0.2657 | <i>P</i> = 0.2866 |
| rs10399805 | TT | 63 (10.1%)        | 49(7.8%)           | 0.083          | T                                                                           | 30.52%            | 26.87%            |
|            | TC | 261 (41.8%)       | 239(38.1%)         |                | C                                                                           | 69.48%            | 73.13%            |
|            | CC | 301 (48.2%)       | 339(54.1%)         |                |                                                                             | <i>P</i> = 0.4602 | <i>P</i> = 0.45   |
| rs10399931 | GG | 270 (43.0%)       | 229 (36.6%)        | 0.047          | G                                                                           | 65.76%            | 61.1%             |
|            | GA | 286 (45.5%)       | 307 (49%)          |                | A                                                                           | 34.24%            | 38.9%             |
|            | AA | 72 (11.5%)        | 90 (14.4%)         |                |                                                                             | <i>P</i> = 0.7758 | <i>P</i> = 0.4277 |
| rs6691378  | TT | 69 (11.1%)        | 53 (8.5%)          | 0.08           | T                                                                           | 32.83%            | 28.64%            |
|            | TC | 271(43.5%)        | 252 (40.3%)        |                | C                                                                           | 67.17%            | 71.36%            |
|            | CC | 283(45.4%)        | 320 (51.2%)        |                |                                                                             | <i>P</i> = 0.7336 | <i>P</i> = 0.7343 |
| rs946261   | AA | 73 (11.6%)        | 63 (10.1%)         | 0.474          | A                                                                           | 33.12%            | 33.07%            |
|            | GA | 270 (43.0%)       | 288 (46.0%)        |                | G                                                                           | 66.88%            | 66.93%            |
|            | GG | 285 (45.4%)       | 275 (43.9%)        |                |                                                                             | <i>P</i> = 0.4592 | <i>P</i> = 0.3251 |

a.Hardy-Weinberg equilibrium was tested by Pearson's Chi-square test
